# Supplementary material for: High-performance Vo-ZnO/ZnS benefiting nanoarchitectonics from the synergism between defect engineering and surface engineering for photoelectrochemical glucose sensors
Source: Royal Society of Chemistry journal article supplement (doi:10.1039/d3ra02869k), 2023-01-01
Supplement: d3ra02869k1.pdf [file d3ra02869k1.pdf]

## Supporting Information

# High performance Vo-ZnO/ZnS benefiting nanoarchitectonics from the synergism between defect engineering and surface engineering for photoelectrochemical glucose sensor

Yongtao Xu <sup>a</sup>, Bingdong Yan <sup>a</sup>, Caiyan Lai <sup>a</sup>, Mingyu Wang <sup>a</sup>, Yang Cao <sup>a</sup>, Jinchun Tu <sup>a</sup>, Delun Chen <sup>a,\*</sup>, Youbin Liu <sup>b,\*</sup>, Qiang Wu <sup>b,c\*</sup>

<sup>a</sup> State Key Laboratory of Marine Resource Utilization in South China Sea, School of Materials Science and Engineering, Hainan University, Haikou 570228, P. R. China;

<sup>b</sup> The Second Affiliated Hospital, School of Tropical Medicine, Hainan Medical University, Haikou 570311, P. R. China.

<sup>c</sup> Key Laboratory of Emergency and Trauma of Ministry of Education, Research Unit of Island Emergency Medicine, Chinese Academy of Medical Sciences (No. 2019RU013), Hainan Medical University, Haikou 571199, P. R. China.

### Reagents and apparatus

FTO glasses were purchased from Outhwaite New Energy Company. Zinc nitrate hexahydrate (Zn(NO<sub>3</sub>)<sub>2</sub>·6H<sub>2</sub>O), urea (Ur), cetyltrimethylammonium bromide (CTAB), ascorbic acid (AA), sodium chloride (NaCl) were obtained from Sinopharm Chemical Reagent Co., Ltd. Glucose (Glu), uric acid (UA), dopamine (DA), fructose (Fru), lactose (Lac), cysteine (Cys), glycine (Gly), glucose oxidase (GOx) were obtained from Shanghai Aladdin Biochemical Technology Co., Ltd. trisodium citrate dihydrate (TCD), sucrose (Suc), disodium hydrogen phosphate dodecahydrate (Na<sub>2</sub>HPO<sub>4</sub>·12H<sub>2</sub>O), sodium dihydrogen phosphate dihydrate (NaH<sub>2</sub>PO<sub>4</sub>·2H<sub>2</sub>O), ethanol obtained from Shanghai Pharmaceuticals.

Scanning electron microscopy (SEM, Hitachi S-3000 4800) and transmission electron microscopy (TEM) using a JEOL-2100F microscope equipped with energy-dispersive spectroscopy (EDS) are used to investigate the microscopic morphology and structure of samples. X-ray diffraction spectroscopy (XRD) using a D8 Tools XRD instrument at a voltage of 40 kV and a current of 30 mA with Cu-K $\alpha$  radiation ( $k = 1.5406 \text{ \AA}$ ) is employed to examine the crystalline structure of samples. X-ray photoelectron spectroscopy (XPS) data of synthetic materials are measured by K-Alpha 1063 XPS to investigate the surface chemical elemental state of the material, Electron paramagnetic resonance (EPR) is used to analyze defects in materials by performing measurements at room temperature with a Bruker X/Q-band E580 FT/CW ELEXSYS spectrometer at room temperature in the X-band (9.86 GHz). The ultraviolet-visible (UV-vis) diffuse reflectance spectra used to investigate the light absorption of the materials were measured with a UV-2550 spectrophotometer. Photoluminescence (PL) experiments for analyzing the carrier complexation of materials are performed using a fluorescence spectrophotometer (Hitachi F7000).

### Photoelectrochemical and glucose sensing testing

The photoelectrochemical properties of the materials were measured using a three-electrode system with an electrochemical workstation (CHI Instruments, Chenhua CHI 660, Shanghai, China), for which the sample was used as the working electrode, Ag/AgCl was the reference electrode, and a platinum sheet was the counter electrode. The electrochemical tests were performed in 0.1 M PBS (pH=7.4). Photocurrent-time test at 0.2V, open-circuit voltage (OCP) test, Mott-Schottky (MS) test and photoelectrochemical impedance spectra (PEIS) for all photoelectrodes test at 10<sup>6</sup> Hz to 0.1 Hz light and open-circuit voltage were performed in the above system. The detection performance of glucose was investigated using 0.1 M PBS containing 2 mM AA.

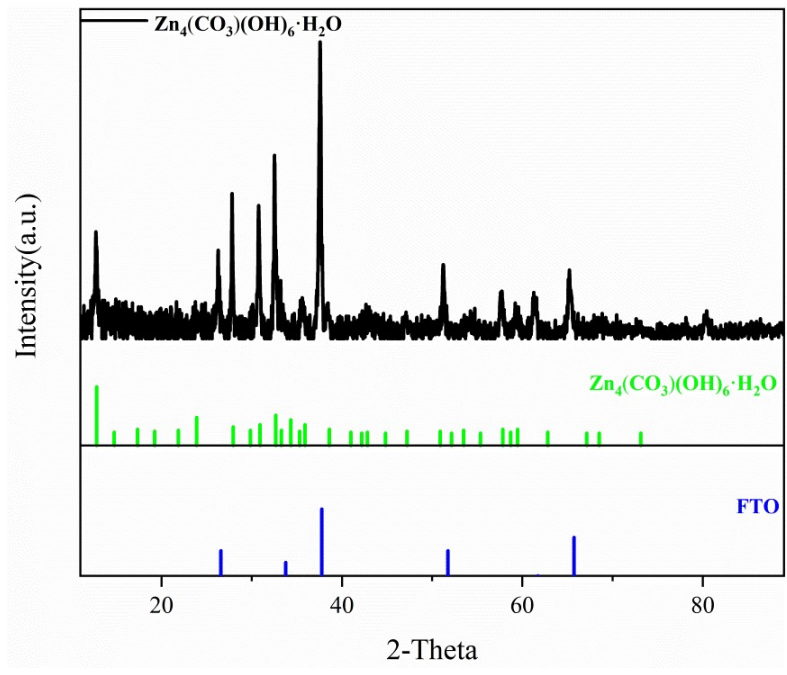

Figure S1 XRD spectra of  $Zn_4(CO_3)(OH)_6 \cdot H_2O$ .

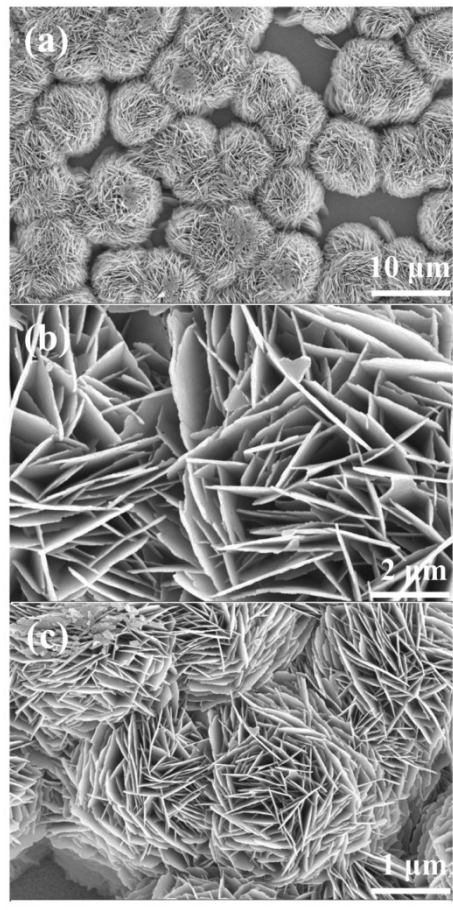

Figure S2 SEM images of  $Zn_4(CO_3)(OH)_6 \cdot H_2O$  (a-c).

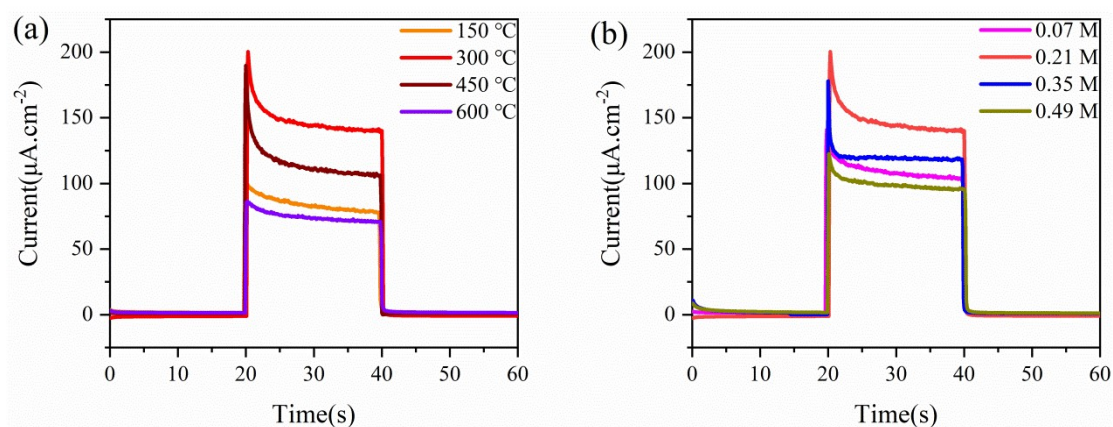

**Figure S3** Effect of temperature (a) and sodium sulfide concentration (b) on the photoelectric response of Vo-ZnO/ZnS.

**Table S1** Comparison of analytical performances of glucose sensors.

| Materials                                           | Sensor type | Liner range<br>(mM) | Detection limit<br>( $\mu$ M) | Sensitivity<br>( $\mu$ A·mM <sup>-1</sup> ·cm <sup>-2</sup> ) | Reference |
|-----------------------------------------------------|-------------|---------------------|-------------------------------|---------------------------------------------------------------|-----------|
| Nafion/GOx/PtNDs/ZnONRs/ITO                         | EC          | 0.005-1             | 30                            | 98.34                                                         | 1         |
| GR/PANI:rGO/GOx                                     | EC          | 0.5-50              | 89                            | 2.8 ( $\mu$ A mM <sup>-1</sup> )                              | 2         |
| graphene                                            | EC          | 0.4-2               | 124.19                        | 16.16                                                         | 3         |
| BiVO <sub>4</sub> /FTO                              | PEC         | 5-35                | -                             | 17.38                                                         | 4         |
| Fe <sub>2</sub> O <sub>3</sub> films                | PEC         | 0.05-6              | 0.05                          | 17.23                                                         | 5         |
| ITO/MTiO <sub>2</sub> -Au NPs-MoS <sub>2</sub> -GOx | PEC         | 0.004-1.75          | 1.2                           | 4.42                                                          | 6         |
| Vo-ZnO/ZnS                                          | PEC         | 0.2-1.4             | 15.9                          | 49.43                                                         | This work |
|                                                     |             | 1.4-3               | -                             | 17.64                                                         |           |

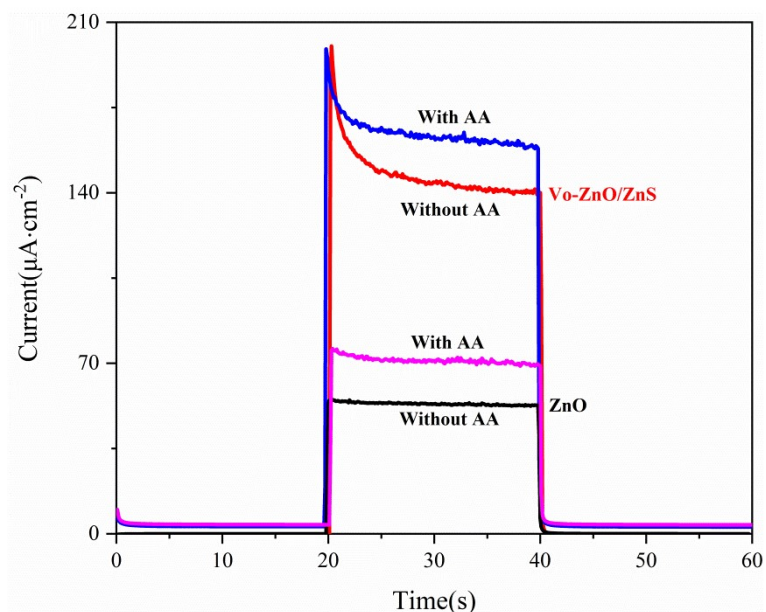

**Figure S4** Photoelectric response of ZnO and Vo-ZnO/ZnS with and without AA.

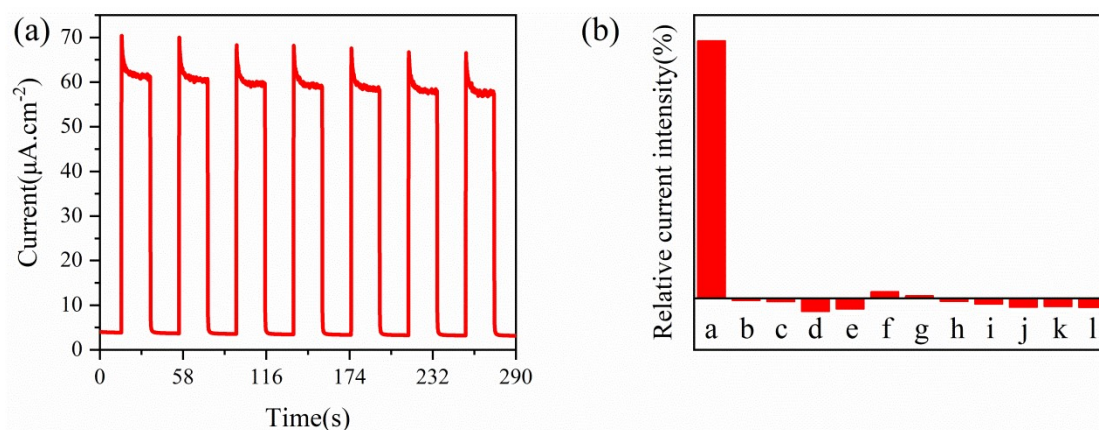

**Figure S5** Stability test of Vo-ZnO/ZnS under absence of 3 mM glucose condition (a); Influence of interferences on the photoelectric response (b).

## Notes and references

1. N. S. Ridhuan, N. Mohamad Nor, K. Abdul Razak, Z. Lockman and N. D. Zakaria, *Journal of Solid State Electrochemistry*, 2021, 25, 1065-1072.
2. A. Popov, R. Aukstakojyte, J. Gaidukevic, V. Lisyte, A. Kausaite-Minkstimiene, J. Barkauskas and A. Ramanaviciene, *Sensors (Basel)*, 2021, 21.
3. S. Wei, Y. Hao, Z. Ying, C. Xu, Q. Wei, S. Xue, H.-M. Cheng, W. Ren, L.-P. Ma and Y. Zeng, *Journal of Materials Science & Technology*, 2020, 37, 71-76.
4. L. He, Z. Yang, C. Gong, H. Liu, F. Zhong, F. Hu, Y. Zhang, G. Wang and B. Zhang, *Journal of Electroanalytical Chemistry*, 2021, 882, 114912.
5. F. Liu, P. Wang, Q. Zhang, Z. Wang, Y. Liu, Z. Zheng, X. Qin, X. Zhang, Y. Dai and B. Huang, *Electroanalysis*, 2019, 31, 1809-1814.
6. B. Çakıroğlu and M. Özacar, *Electroanalysis*, 2020, 32, 166-177.
